# Supplementary material for: Modulation of Bromo- and Extra-Terminal Domain (BET) Proteins Exerts Neuroprotective Effects in Cell Culture Models of Parkinson’s Disease
Source: MDPI journal article supplement (doi:10.3390/biomedicines14010244), 2026-01-21
Supplement: s1 [file Supplementary figures_Martella et al. 2026_revised.pdf › Supplementary figures_Martella et al. 2026_revised.pdf]

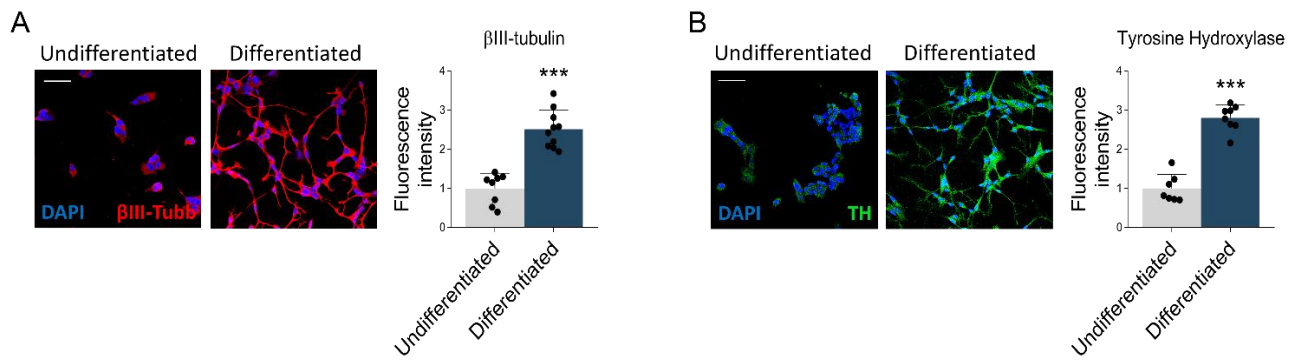

**Figure S1.** Evaluation of neuronal differentiation efficiency in SH-SY5Y cells. Confocal microscopy representative images and quantitative analysis of (A)  $\beta$ III-tubulin (red) and (B) Tyrosine hydroxylase (green) in undifferentiated and differentiated SH-SY5Y cells. SH-SY5Y differentiation was induced in DMEM containing 1% FBS and 10  $\mu$ M retinoic acid for 72 hours. DAPI (blue) was used to counterstain nuclei. N=7-10 independent experiments. Scale bar: 50  $\mu$ m. Statistical analysis was performed by using the Unpaired Student's t-test. \*\*\*  $p < 0.001$ . Data are represented as means  $\pm$  SD. The black dots depicted around the SD represent individual values, each derived from the average fluorescence calculated in the cells present in a single image (each image derives from a different experiment).

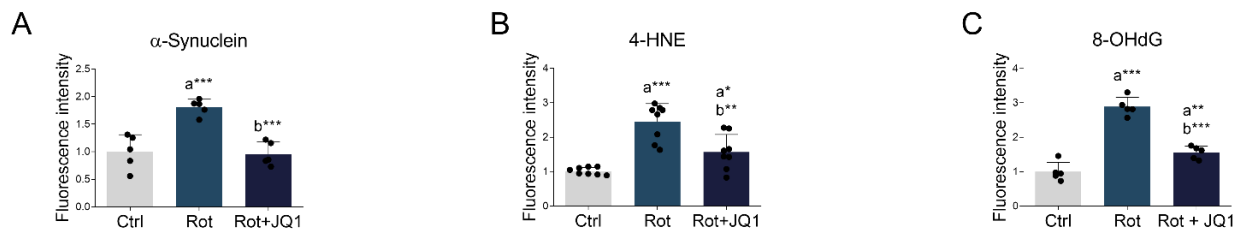

**Figure S2.** Quantitative analysis of oxidative damage markers. Immunofluorescence signal quantification of (A)  $\alpha$ -synuclein, (B) 4-HNE, and (C) 8-OHdG in differentiated SH-SY5Y treated with DMSO (Ctrl), rotenone (Rot, 50 nM) or rotenone with JQ1 (Rot+JQ1, 100 nM) for 24h. N=5-8 independent experiments. Data are represented as means  $\pm$  SD. Statistical analysis was assessed using one-way ANOVA, followed by Tukey's post hoc. "a" indicates statistical significance vs Ctrl; "b" indicates statistical significance vs rotenone group. \*  $p < 0.05$ ; \*\*  $p < 0.01$ ; \*\*\*  $p < 0.001$ .

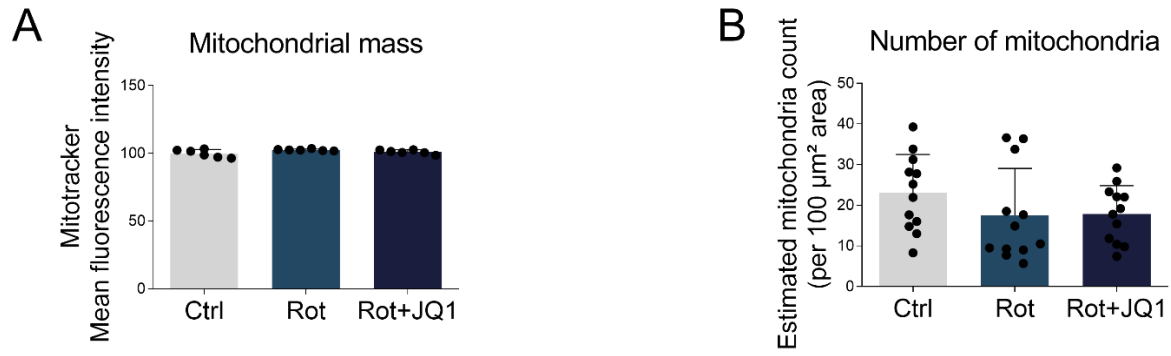

**Figure S3.** Evaluation of mitochondrial population. (A) Quantitative analysis of mitochondrial mass was assessed by estimating the fluorescence intensity of Mitotracker dye in differentiated SH-SY5Y treated with DMSO (Ctrl), rotenone (Rot, 50 nM) or rotenone with JQ1 (Rot+JQ1, 100 nM) for 24h. Mean fluorescence intensity was calculated by dividing total fluorescence by cell count. N=6 independent experiments. (B) Statistical analysis of mitochondrial number, quantified from FIB/SEM micrographs of the central region of the cell body in differentiated SH-SY5Y cells treated as in A). Counts were performed at varying magnifications and normalized to the number of mitochondria per 100  $\mu\text{m}^2$ . Data are represented as means  $\pm$  SD. Statistical analysis was assessed using one-way ANOVA, followed by Tukey's post hoc.

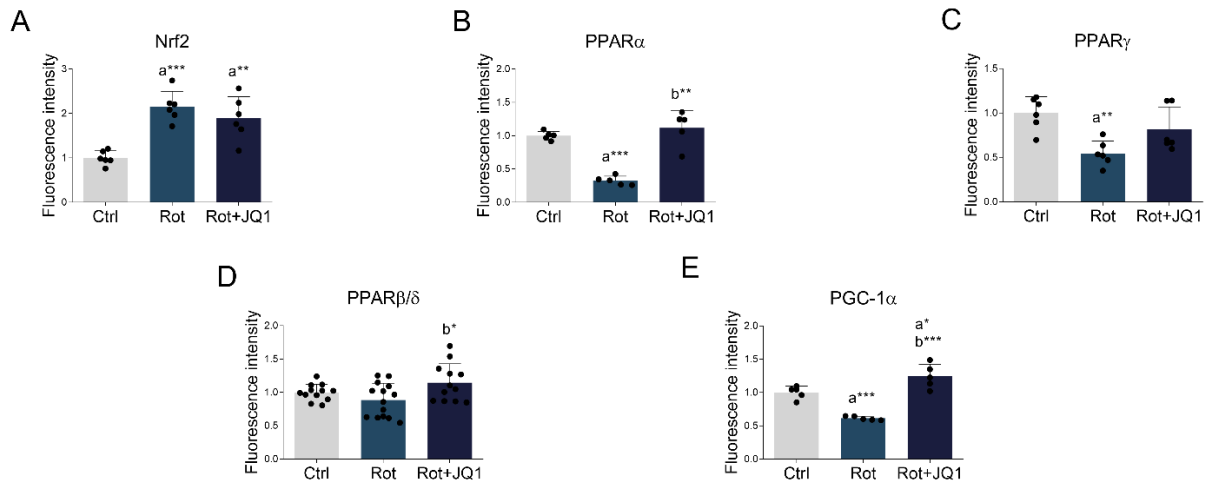

**Figure S4.** Quantitative analysis of transcription factors involved in redox metabolism and mitochondrial homeostasis. Immunofluorescence signal quantification of (A) Nrf2, (B) PPAR $\alpha$ , (C) PPAR $\gamma$ , (D) PPAR $\beta/\delta$ , and (E) PGC-1 $\alpha$  in differentiated SH-SY5Y treated with DMSO (Ctrl), rotenone (Rot, 50 nM) or rotenone with JQ1 (Rot+JQ1, 100 nM) for 24h. N=5-12 independent experiments. Data are represented as means  $\pm$  SD. Statistical analysis was assessed using one-way ANOVA, followed by Tukey's post hoc. "a" indicates statistical significance vs Ctrl; "b" indicates statistical significance vs rotenone group. \*  $p < 0.05$ ; \*\*  $p < 0.01$ ; \*\*\*  $p < 0.001$ .

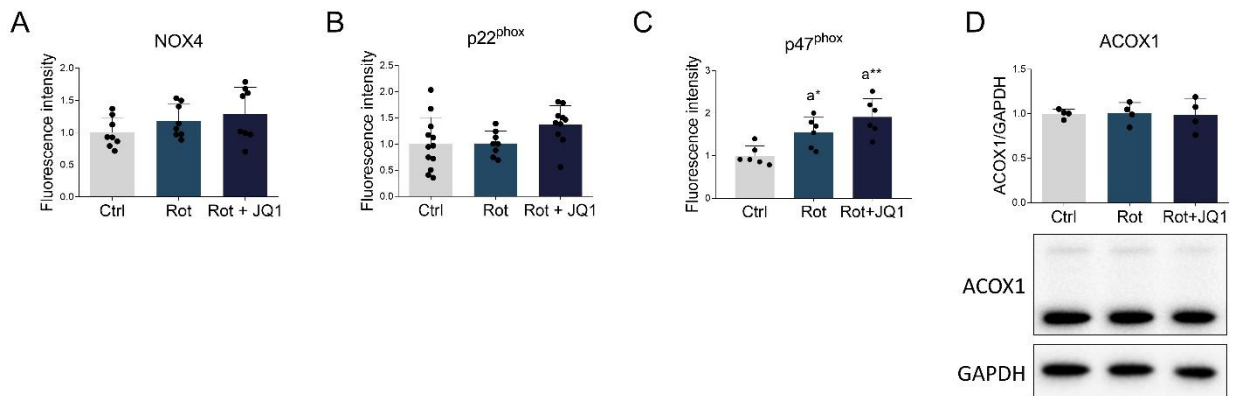

**Figure S5.** Impact of BET inhibition on the main pro-oxidant cell systems. Fluorescence intensity quantification of (A) NOX4, (B) p22<sup>phox</sup>, and (C) p47<sup>phox</sup> NADPH oxidase subunits in SH-SY5Y treated DMSO (Ctrl), rotenone (Rot, 50 nM) or rotenone with JQ1 (Rot+JQ1, 100 nM) for 24h. (D) Representative Western blot and densitometric analysis of ACOX1 in differentiated SH-SY5Y cells treated as indicated above. GAPDH was chosen as the loading control. Data are represented as means  $\pm$  SD. N=4 experimental replicates. Statistical analysis was performed by using One-Way ANOVA followed by Tukey's post hoc test. "a" indicates statistical significance vs Ctrl. \*  $p < 0.05$ ; \*\*  $p < 0.01$ .

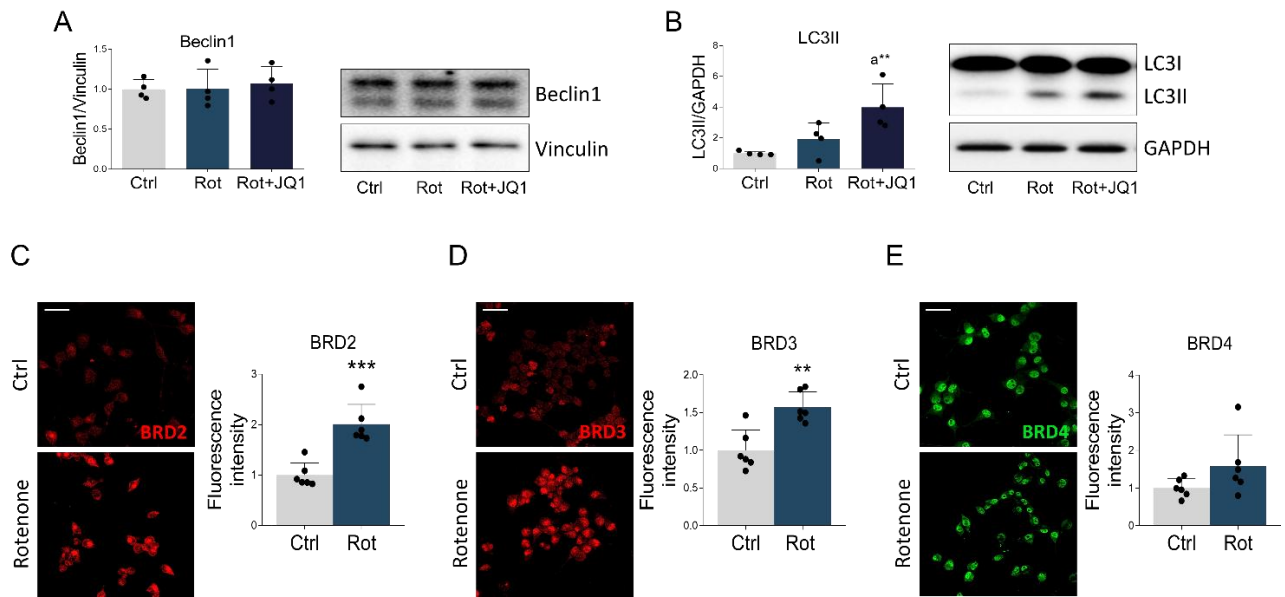

**Figure S6.** Expression of autophagy-related proteins in SH-SY5Y cells and BET proteins in N1E-115 cells. Representative immunoblot and densitometric analysis of (A) Beclin1 and (B) LC3 in lysates from differentiated SH-SY5Y treated with DMSO (Ctrl), rotenone (Rot, 50 nM) or rotenone with JQ1 (Rot+JQ1, 100 nM) for 24h. N=4 biological replicates. Vinculin and GAPDH served to normalize protein loading. Statistical analysis was performed by using One-Way ANOVA followed by Tukey's post hoc test. "a" indicates statistical significance vs Ctrl. \*\* $p < 0.01$ . Confocal microscopy representative images and quantitative analysis of (C) BRD2 (red), (D) BRD3 (red), and (E) BRD4 (green) in differentiated N1E-115 cells treated with DMSO (Ctrl) and rotenone (Rot, 50 nM) for 24h. DAPI (blue) was used to counterstain nuclei. N=6 independent experiments. Scale bar: 50  $\mu\text{m}$ . Statistical analysis was performed by using the Unpaired Student's t-test. \*\* $p < 0.01$ ; \*\*\* $p < 0.001$ . Data are represented as means  $\pm$  SD. The black dots depicted around the SD represent individual values, each derived from the average fluorescence calculated in the cells present in a single image (each image derives from a different experiment).
