# Supplementary material for: Modulation of Bromo- and Extra-Terminal Domain (BET) Proteins Exerts Neuroprotective Effects in Cell Culture Models of Parkinson’s Disease
Source: MDPI journal article supplement (doi:10.3390/biomedicines14010244), 2026-01-21
Supplement: s1 [file Supplementary table 1_Martella et al. 2026_revised.pdf › Supplementary table 1_Martella et al. 2026_revised.pdf]

**Supplementary Table 1:** List of antibodies used in this study

| <b>Antibody</b>     | <b>Ref</b> | <b>Provider</b>                  | <b>Application and Dilution</b> |
|---------------------|------------|----------------------------------|---------------------------------|
| 4-HNE               | MA527570   | ThermoFisher Scientific          | IF (1:100)                      |
| 8-OHdG              | sc-66036   | Santa Cruz Biotechnology         | IF (1:100)                      |
| $\beta$ III-tubulin | sc-80005   | Santa Cruz Biotechnology         | IF (1:200)                      |
| ACOX1               | Ab184032   | Abcam                            | WB (1:1000)                     |
| Akt1/2/3            | sc-8312    | Santa Cruz Biotechnology         | WB (1:1000)                     |
| AMPK                | sc-25792   | Santa Cruz Biotechnology         | WB (1:1000)                     |
| Beclin 1            | sc-11427   | Santa Cruz Biotechnology         | WB (1:1000)                     |
| BRD2                | sc-393720  | Santa Cruz Biotechnology         | IF (1:50)                       |
| BRD3                | sc-81202   | Santa Cruz Biotechnology         | IF (1:50)                       |
| BRD4                | NBP1-18874 | Novus Biological                 | IF (1:500)                      |
| Catalase            | sc-271803  | Santa Cruz Biotechnology         | WB (1:500)                      |
| GAPDH               | sc-32233   | Santa Cruz Biotechnology         | WB (1:5000)                     |
| GPX1                | Ab22604    | Abcam                            | WB (1:1000)                     |
| GSH                 | Ab19534    | Abcam                            | IF (1:150)                      |
| LC3                 | L7543      | Merck Life Science               | IF (1:400);<br>WB (1:2000)      |
| NOX2                | sc-130543  | Santa Cruz Biotechnology         | WB (1:1000)                     |
| NOX4                | sc-518092  | Santa Cruz Biotechnology         | IF (1:50)                       |
| Nrf2                | sc-365949  | Santa Cruz Biotechnology         | IF (1:100)                      |
| p22phox             | sc-130551  | Santa Cruz Biotechnology         | IF (1:50)                       |
| p47phox             | sc-17844   | Santa Cruz Biotechnology         | IF (1:50)                       |
| p-Akt               | sc-7985    | Santa Cruz Biotechnology         | WB (1:500)                      |
| p-AMPK              | sc-33524   | Santa Cruz Biotechnology         | WB (1:300)                      |
| PGC1 $\alpha$       | sc-13067   | Santa Cruz Biotechnology         | IF (1:50)                       |
| PPAR $\alpha$       | Ab8934     | Abcam                            | IF (1:300)                      |
| PPAR $\beta/\delta$ | Ab32673    | Abcam                            | IF (1:100)                      |
| PPAR $\gamma$       | Ab59256    | Abcam                            | IF (1:100)                      |
| Sir2                | #07-131    | Upstate Cell Signaling Solutions | WB (1:500)                      |
| SOD1                | sc-271014  | Santa Cruz Biotechnology         | WB (1:300)                      |
| SOD2                | sc-137254  | Santa Cruz Biotechnology         | WB (1:300)                      |

---

|                                                                                                   |          |                          |              |
|---------------------------------------------------------------------------------------------------|----------|--------------------------|--------------|
| Tyrosine hydroxylase                                                                              | 701949   | ThermoFisher Scientific  | IF (1:100)   |
| Vinculin                                                                                          | sc-73614 | Santa Cruz Biotechnology | WB (1:500)   |
| $\alpha$ -synuclein                                                                               | sc-12767 | Santa Cruz Biotechnology | IF (1:50)    |
| Goat Anti-Mouse IgG (H + L)-HRP Conjugate                                                         | #1706516 | Biorad Laboratories      | WB (1:10000) |
| Goat Anti-Rabbit IgG (H + L)-HRP Conjugate                                                        | #1706515 | Biorad Laboratories      | WB (1:10000) |
| Goat anti-Rabbit IgG (Heavy chain), Superclonal™ Recombinant Secondary Antibody, Alexa Fluor™ 488 | A27034   | Thermo Fisher Scientific | IF (1:300)   |
| Goat anti-Mouse IgG (H+L), Superclonal™ Recombinant Secondary Antibody, Alexa Fluor™ 555          | A28180   | Thermo Fisher Scientific | IF (1:300)   |

---
